# Supplementary material
Source: PubMed Central journal article supplement (PMC2783836)
Supplement: NIHMS145865-supplement-supplement_1.pdf [file NIHMS145865-supplement-supplement_1.pdf]

**Table S1. Epitopes tested in this study.**

| <u>HLA<sup>a</sup></u> | <u>Epitope sequence<sup>b</sup></u> | <u>HIV-1 protein</u> | <u>Database frequency<sup>d</sup></u> |
|------------------------|-------------------------------------|----------------------|---------------------------------------|
| A*0101 (A1)            | RRGWEVLKY                           | gp41 (787–795)       | 0.147                                 |
| A*0201 (A2)            | VIYQYMDDL                           | RT (179–187)         | 0.856                                 |
| A*0201 (A2)            | ILKEPVHGV                           | RT (309–317)         | 0.773                                 |
| A*0201 (A2)            | ALVEICTEM                           | RT (33–41)           | 0.711                                 |
| A*0201 (A2)            | AHIRLQQL                            | Vpr (59–67)          | 0.591                                 |
| A*0201 (A2)            | SLYNTVATL                           | Gag p17 (77–85)      | 0.318                                 |
| A*0201 (A2)            | VLEWRFD SRL                         | Nef (180–189)        | 0.144                                 |
| A*0201 (A2)            | PLTFGW CYKL                         | Nef (136–145)        | 0.058                                 |
| A*0201 (A2)            | RGPGR AFVTI                         | gp160 (311–320)      | 0.010                                 |
| A*0201 (A2)            | SLLNATDIAV                          | gp160 (813–822)      | 0.000                                 |
| A*0301 (A3)            | TVYYGVPVWK                          | gp160 (37–46)        | 0.924                                 |
| A*0301 (A3)            | KIRLRPGGK                           | Gag p17 (18–26)      | 0.813                                 |
| A*0301 (A3)            | QVPLRPMTYK                          | Nef (73–82)          | 0.770                                 |
| A*0301 (A3)            | ALVEICTEMEK                         | RT (33–43)           | 0.691                                 |
| A*0301 (A3)            | RLRPGGKKKY                          | Gag p17 (20–29)      | 0.646                                 |
| A*0301 (A3)            | RLRPGGKKK                           | Gag p17 (20–28)      | 0.646                                 |
| A*0301 (A3)            | AIFQSSMTK                           | RT (158–166)         | 0.546                                 |
| A*0301 (A3)            | RLRDLLIVTR                          | gp160 (770–780)      | 0.371                                 |
| A*1101 (A11)           | IYQEPFKNLK                          | RT (341–350)         | 0.794                                 |
| A*1101 (A11)           | PLRPMTYK                            | Nef (75–82)          | 0.782                                 |
| A*1101 (A11)           | ACQGVGGPGHK                         | Gag p24 (217–227)    | 0.722                                 |
| A*1101 (A11)           | AIFQSSMTK                           | RT (158–166)         | 0.546                                 |
| A*1101 (A11)           | TLYCVHQRI                           | Gag p17 (84–92)      | 0.293                                 |
| A*1101 (A11)           | AVDLSHFLK                           | Nef (84–92)          | 0.288                                 |
| A*2301 (A23)           | RYLKDQQLL                           | gp41 (585–593)       | 0.497                                 |
| A*2301 (A23)           | LRSFLFS                             | gp41 (760–767)       | 0.091                                 |
| A*2402 (A24)           | LFCASDAKAY                          | gp160 (52–61)        | 0.848                                 |
| A*2402 (A24)           | RYPLTFGW                            | Nef (134–141)        | 0.547                                 |
| A*2402 (A24)           | RYLKDQQLL                           | gp160 (585–593)      | 0.497                                 |
| A*2402 (A24)           | KYKCLKHIVW                          | Gag p17 (28–36)      | 0.268                                 |
| A*2402 (A24)           | RDYVDRFFKTL                         | Gag p24 (162–172)    | 0.005                                 |
| A*2501 (A25)           | ETINEEAAEW                          | Gag p24 (71–80)      | 0.869                                 |
| A*2501 (A25)           | QAISPRTLNAW                         | Gag p24 (13–23)      | 0.540                                 |
| A*2601 (A26)           | EVIPMFSAL                           | Gag p24 (35–43)      | 0.828                                 |
| A*2902 (A29)           | SFEPIPIHY                           | gp120 (209–217)      | 0.751                                 |
| A*3002 (A30)           | RSLYNTVATLY                         | Gag p17 (76–86)      | 0.177                                 |
| A*3101 (A31)           | RLRDLLIVTR                          | gp160 (770–780)      | 0.371                                 |
| A*3201 (A32)           | RIKQIINMW                           | gp160 (419–427)      | 0.477                                 |
| A*3201 (A32)           | PIQKETWETW                          | RT (392–401)         | 0.330                                 |
| A*33                   | RYPLTFGW                            | Nef (134–141)        | 0.547                                 |
| B*0702 (B7)            | TPQDLNTML                           | Gag p24 (48–56)      | 0.975                                 |

|              |              |                   |       |
|--------------|--------------|-------------------|-------|
| B*0702 (B7)  | SPRTLNAWV    | Gag p24 (16–24)   | 0.924 |
| B*0702 (B7)  | RPNNNTRKSI   | gp160 (298–307)   | 0.421 |
| B*0702 (B7)  | IPRRIRQGL    | gp160 (843–851)   | 0.340 |
| B*0702 (B7)  | TPGPGVRYPL   | Nef (128–137)     | 0.193 |
| B*0702 (B7)  | RPMTYKAAL    | Nef (77–85)       | 0.091 |
| B*0702 (B7)  | FPVTPQVPLR   | Nef (68–77)       | 0.066 |
| B*0702 (B7)  | TPQVPLRPM    | Nef (71–79)       | 0.066 |
| B*0801 (B8)  | GPKVKQWPL    | RT (18–26)        | 0.959 |
| B*0801 (B8)  | DCKTILKAL    | Gag p24 (197–205) | 0.874 |
| B*0801 (B8)  | EIYKRWII     | Gag p24 (128–135) | 0.864 |
| B*0801 (B8)  | FLKEKGGL     | Nef (90–97)       | 0.778 |
| B*0801 (B8)  | QGLERALL     | gp160 (849–856)   | 0.538 |
| B*0801 (B8)  | YLKDQQLL     | gp160 (586–593)   | 0.497 |
| B*0801 (B8)  | GGKKKYKL     | Gag p17 (24–31)   | 0.278 |
| B*0801 (B8)  | ELRSLYNTV    | Gag p17 (74–82)   | 0.197 |
| B*0801 (B8)  | WPTVRERM     | Nef (13–20)       | 0.189 |
| B*0801 (B8)  | RVKEKYQHL    | gp160 (2–10)      | 0.020 |
| B*1402 (B14) | DRFYKTLRA    | Gag p24 (166–174) | 0.899 |
| B*1402 (B14) | ERYLKDQQL    | gp160 (584–592)   | 0.513 |
| B*1501 (B62) | LVGKLNWASQIY | RT (260–271)      | 0.969 |
| B*1501 (B62) | GLNKIVRMV    | Gag p24 (137–145) | 0.944 |
| B*1501 (B62) | IKLEPVHGVY   | RT(309–318)       | 0.773 |
| B*1501 (B62) | TQGYFPDWQNY  | Nef (117–127)     | 0.757 |
| B*1501 (B62) | RMRRAEPAA    | Nef (19–27)       | 0.251 |
| B*1501 (B62) | AAVDLSHFL    | Nef (83–91)       | 0.206 |
| B*15         | SFNCGGEFF    | gp120 (375–383)   | 0.716 |
| B*1503 (B72) | RKAKIIRDY    | INT (263–271)     | 0.701 |
| B*1503 (B72) | WRFDSRLAF    | Nef (183–191)     | 0.272 |
| B*1801 (B18) | FRDYVDIFYK   | Gag p24 (161–170) | 0.919 |
| B*1801 (B18) | YPLTFGWYCY   | Nef (135–143)     | 0.058 |
| B*2705 (B27) | IRLRPGGKK    | Gag p17 (19–27)   | 0.869 |
| B*2705 (B27) | KRWIILGLNK   | Gag p24 (131–140) | 0.823 |
| B*2705 (B27) | GRRGWEALKY   | gp160 (786–795)   | 0.386 |
| B*2705 (B27) | RRQDILDWI    | Nef (105–114)     | 0.107 |
| B*3501 (B35) | TVLDVGDAY    | RT (107–115)      | 0.959 |
| B*3501 (B35) | WASRELERF    | Gag p17 (36–44)   | 0.949 |
| B*3501 (B35) | VPLRPMTY     | Nef (74–81)       | 0.831 |
| B*3501 (B35) | VPVWKEATTTL  | gp160 (42–52)     | 0.695 |
| B*3501 (B35) | NPDIVIYQY    | RT (175–183)      | 0.660 |
| B*3501 (B35) | DPNPQEVVL    | gp160 (78–86)     | 0.381 |
| B*3501 (B35) | TAVPWNASW    | gp160 (606–614)   | 0.289 |
| B*3501 (B35) | VPLDEDFRKY   | RT (118–127)      | 0.165 |
| B*3501 (B35) | PPIPVGDIY    | Gag p24 (122–130) | 0.086 |
| B*3501 (B35) | NSSKVSQNY    | Gag p17 (124–132) | 0.020 |
| B*3501 (B35) | HPDIVIYQY    | RT (175–183)      | 0.000 |
| B*3801 (B38) | MHEDIISLW    | gp120 (101–110)   | 0.787 |
| B*3901 (B39) | GHQAAMQML    | Gag p24 (61–69)   | 0.944 |
| B*4001 (B60) | SEGATPQDL    | Gag p24 (44–52)   | 0.955 |
| B*4001 (B60) | IEELRQHLL    | RT (202–210)      | 0.701 |

|                |             |                   |       |
|----------------|-------------|-------------------|-------|
| B*4001 (B60)   | KEKGGLEGL   | Nef (92–100)      | 0.679 |
| B*4001 (B60)   | QELKNSAVSL  | gp160 (805–814)   | 0.563 |
| B*4001 (B60)   | AAVDLSHFL   | Nef (83–91)       | 0.206 |
| B*4001 (B60)   | IEIKDTKEAL  | Gag p17 (92–101)  | 0.167 |
| B*4002 (B61)   | CTERQANFL   | Gag p15 (63–71)   | 0.601 |
| B*4201 (B42)   | TPQDLNTML   | Gag p24 (48–56)   | 0.975 |
| B*4201 (B42)   | TPGPGVRYPL  | Nef (128–137)     | 0.193 |
| B*4201 (B42)   | YPGIKVRQL   | RT (271–279)      | 0.124 |
| B*4402 (B44)   | RDYVDRFYKTL | Gag p24 (162–172) | 0.889 |
| B*4402 (B44)   | AEQASQDVKNW | Gag p24 (174–184) | 0.278 |
| B*4402 (B44)   | AENLWVTVY   | gp160 (31–40)     | 0.061 |
| B*5101 (B51)   | EKEGKISKI   | RT (42–50)        | 0.866 |
| B*5101 (B51)   | TAFTIPSI    | RT (128–135)      | 0.722 |
| B*5101 (B51)   | EAVRHFPRI   | Vpr (29–37)       | 0.333 |
| B*5101 (B51)   | RAIEAQQML   | gp160 (557–565)   | 0.000 |
| B*5701 (B57)   | KAFSPEVI    | p24 (30–37)       | 0.970 |
| B*5701 (B57)   | KAFSPEVIPMF | Gag p24 (30–40)   | 0.970 |
| B*5701 (B57)   | KTAVQMAVF   | INT (173–181)     | 0.907 |
| B*5701 (B57)   | YFPDWQNYT   | Nef (120–128)     | 0.778 |
| B*5701 (B57)   | TSTLQEIQGW  | Gag p24 (108–117) | 0.727 |
| B*5701 (B57)   | ISPRTLNAW   | Gag p24 (15–23)   | 0.697 |
| B*5701 (B57)   | HTQGYFPDWQ  | Nef (116–125)     | 0.683 |
| B*5701 (B57)   | IVLPEKDSW   | RT (244–252)      | 0.619 |
| B*5701 (B57)   | QASQEVKNW   | Gag p24 (176–184) | 0.520 |
| B*5801 (B58)   | TSTLQEIQGW  | Gag p24 (108–117) | 0.727 |
| B*5801 (B58)   | TSTVEEQIQW  | Gag p24 (108–117) | 0.000 |
| Cw5            | SAEPVPLQL   | Rev (61–75)       | 0.206 |
| Cw7            | DILDLWIY    | Nef (106–115)     | 0.107 |
| Cw8            | AAVDLSHFL   | Nef (83–91)       | 0.206 |
| Cw*1203 (Cw12) | CCFHCQVC    | Tat (30–37)       | 0.776 |

<sup>a</sup> HLA restriction. For cases in which the genotype is defined, the serotype is shown in parentheses.

<sup>b</sup> 120 defined optimal epitopes [27, 28] were analyzed in 45 subjects in this study. Conserved epitopes were arbitrarily defined as belonging to the upper quartile of the tested epitopes in terms of database frequency (conserved in  $\geq 78.68\%$  of the sequences), while epitopes in the lower three quartiles were considered to be variable epitopes.

<sup>c</sup> HXB2 amino acid numerations are used.

<sup>d</sup> Frequency of the epitopic sequence in HIV-1 subtype B in the Los Alamos HIV Sequence Database in year 2005 [29].

**Table S2. Correlation of CTL responses with viral load and CD4<sup>+</sup> T cell counts <sup>a</sup>.**

| Infection stage                  | VL/CD4 <sup>+</sup> T cell counts | CTL responses                    | Epitopes (location/type) | Spearman r                    | <i>p</i>     |        |        |
|----------------------------------|-----------------------------------|----------------------------------|--------------------------|-------------------------------|--------------|--------|--------|
| Primary infection                | log <sub>10</sub> VL <sup>b</sup> | Number of recognized epitopes    | All epitopes             | 0.1320                        | 0.4568       |        |        |
|                                  |                                   |                                  | Gag                      | -0.3390                       | 0.0499       |        |        |
|                                  |                                   |                                  | Pol                      | -0.0589                       | 0.7407       |        |        |
|                                  |                                   |                                  | Aux                      | 0.0725                        | 0.6835       |        |        |
|                                  |                                   |                                  | Env                      | 0.3786                        | 0.0273       |        |        |
|                                  |                                   |                                  | Nef                      | 0.2413                        | 0.1693       |        |        |
|                                  |                                   |                                  | Variable                 | 0.1715                        | 0.3322       |        |        |
|                                  |                                   |                                  | Conserved                | -0.0025                       | 0.9887       |        |        |
|                                  |                                   | Fraction of recognized epitopes  | All epitopes             | 0.0608                        | 0.7329       |        |        |
|                                  |                                   |                                  | Variable                 | 0.0496                        | 0.7804       |        |        |
|                                  |                                   |                                  | Conserved                | -0.0335                       | 0.8506       |        |        |
|                                  |                                   | Total magnitude of CTL responses | All epitopes             | 0.3092                        | 0.0752       |        |        |
|                                  |                                   |                                  | Gag                      | -0.2151                       | 0.2218       |        |        |
|                                  |                                   |                                  | Pol                      | -0.0940                       | 0.5968       |        |        |
|                                  |                                   |                                  | Aux                      | 0.1539                        | 0.3850       |        |        |
|                                  |                                   |                                  | Env                      | 0.4380                        | 0.0096       |        |        |
|                                  |                                   |                                  | Nef                      | 0.1424                        | 0.4219       |        |        |
|                                  |                                   |                                  | Variable                 | 0.4010                        | 0.0188       |        |        |
|                                  |                                   |                                  | Conserved                | 0.0446                        | 0.8023       |        |        |
|                                  |                                   | Mean magnitude of CTL responses  | All epitopes             |                               |              |        |        |
|                                  |                                   |                                  | Variable                 | 0.3412                        | 0.0483       |        |        |
|                                  |                                   |                                  | Conserved                | 0.0495                        | 0.7811       |        |        |
|                                  |                                   | CD4 <sup>+</sup> T cell counts   |                          | Number of recognized epitopes | All epitopes | 0.0385 | 0.8291 |
|                                  |                                   |                                  |                          |                               | Gag          | 0.0081 | 0.9636 |
| Pol                              | 0.0160                            |                                  |                          |                               | 0.9283       |        |        |
| Aux                              | 0.1280                            |                                  |                          |                               | 0.4705       |        |        |
| Env                              | 0.0203                            |                                  |                          |                               | 0.9092       |        |        |
| Nef                              | -0.0229                           |                                  |                          |                               | 0.8978       |        |        |
| Variable                         | 0.1032                            |                                  |                          |                               | 0.5614       |        |        |
| Conserved                        | -0.1288                           |                                  |                          |                               | 0.4678       |        |        |
| Fraction of recognized epitopes  | All epitopes                      |                                  |                          | 0.0878                        | 0.6214       |        |        |
|                                  | Variable                          |                                  |                          | 0.1433                        | 0.4190       |        |        |
|                                  | Conserved                         |                                  |                          | -0.1253                       | 0.4801       |        |        |
| Total magnitude of CTL responses | All epitopes                      |                                  |                          | -0.1285                       | 0.4688       |        |        |
|                                  | Gag                               |                                  |                          | 0.0075                        | 0.9666       |        |        |
|                                  | Pol                               |                                  |                          | 0.0361                        | 0.8394       |        |        |
|                                  | Aux                               |                                  |                          | 0.0843                        | 0.6357       |        |        |
|                                  | Env                               |                                  |                          | -0.0788                       | 0.6579       |        |        |
|                                  | Nef                               |                                  |                          | -0.1238                       | 0.4854       |        |        |
|                                  | Variable                          |                                  |                          | -0.1775                       | 0.3153       |        |        |
|                                  | Conserved                         |                                  |                          | -0.1272                       | 0.4734       |        |        |
| Mean magnitude of CTL responses  | All epitopes                      |                                  |                          | -0.1661                       | 0.3478       |        |        |
|                                  | Variable                          |                                  |                          | -0.3022                       | 0.0824       |        |        |
|                                  | Conserved                         |                                  |                          | -0.1449                       | 0.4137       |        |        |

|                                |                                  |                                  |              |                         |         |        |
|--------------------------------|----------------------------------|----------------------------------|--------------|-------------------------|---------|--------|
| Chronic infection <sup>b</sup> | log <sub>10</sub> VL             | Number of recognized epitopes    | All epitopes | -0.1266                 | 0.6403  |        |
|                                |                                  |                                  | Gag          | -0.2967                 | 0.2645  |        |
|                                |                                  |                                  | Pol          | 0.1736                  | 0.5203  |        |
|                                |                                  |                                  | Aux          | Analysis 1 <sup>c</sup> | -0.3027 | 0.2544 |
|                                |                                  |                                  |              | Analysis 2 <sup>c</sup> | -0.4976 | 0.0498 |
|                                |                                  |                                  | Env          | 0.1111                  | 0.6820  |        |
|                                |                                  |                                  | Nef          | 0.1386                  | 0.6087  |        |
|                                |                                  |                                  | Variable     | 0.0030                  | 0.9912  |        |
|                                |                                  |                                  | Conserved    | -0.2585                 | 0.3338  |        |
|                                |                                  | Fraction of recognized epitopes  | All epitopes | -0.3976                 | 0.1272  |        |
|                                |                                  |                                  | Variable     | -0.2024                 | 0.4523  |        |
|                                |                                  |                                  | Conserved    | -0.4019                 | 0.1228  |        |
|                                |                                  | Total magnitude of CTL responses | All epitopes | -0.0324                 | 0.9035  |        |
|                                |                                  |                                  | Gag          | Analysis 1 <sup>c</sup> | -0.3587 | 0.1725 |
|                                |                                  |                                  |              | Analysis 2 <sup>c</sup> | -0.5130 | 0.0421 |
|                                |                                  |                                  | Pol          | 0.2108                  | 0.4332  |        |
|                                |                                  |                                  | Aux          | -0.2579                 | 0.3349  |        |
|                                |                                  |                                  | Env          | 0.1057                  | 0.6969  |        |
|                                |                                  |                                  | Nef          | 0.1703                  | 0.5283  |        |
|                                |                                  |                                  | Variable     | 0.0133                  | 0.9612  |        |
|                                |                                  |                                  | Conserved    | -0.0983                 | 0.7174  |        |
|                                |                                  | Mean magnitude of CTL responses  | All epitopes | -0.1015                 | 0.7083  |        |
|                                |                                  |                                  | Variable     | 0.0721                  | 0.7907  |        |
|                                |                                  |                                  | Conserved    | -0.0747                 | 0.7834  |        |
| CD4 <sup>+</sup> T cell counts | Number of recognized epitopes    | All epitopes                     | -0.0734      | 0.7871                  |         |        |
|                                |                                  | Gag                              | 0.3647       | 0.1649                  |         |        |
|                                |                                  | Pol                              | -0.3006      | 0.2579                  |         |        |
|                                |                                  | Aux                              | 0.1396       | 0.6061                  |         |        |
|                                |                                  | Env                              | -0.5398      | 0.0309                  |         |        |
|                                |                                  | Nef                              | -0.2093      | 0.4366                  |         |        |
|                                |                                  | Variable                         | -0.1576      | 0.56                    |         |        |
|                                |                                  | Conserved                        | 0.2475       | 0.3553                  |         |        |
|                                |                                  | Fraction of recognized epitopes  | All epitopes | 0.1722                  | 0.5237  |        |
|                                | Variable                         |                                  | 0.0207       | 0.9395                  |         |        |
|                                | Conserved                        |                                  | 0.3485       | 0.1859                  |         |        |
|                                | Total magnitude of CTL responses | All epitopes                     | -0.0765      | 0.7783                  |         |        |
|                                |                                  | Gag                              | 0.2242       | 0.4039                  |         |        |
|                                |                                  | Pol                              | -0.2755      | 0.3017                  |         |        |
|                                |                                  | Aux                              | 0.1436       | 0.5956                  |         |        |
|                                |                                  | Env                              | -0.4884      | 0.0594                  |         |        |
|                                |                                  | Nef                              | -0.1134      | 0.6757                  |         |        |
|                                |                                  | Variable                         | -0.0765      | 0.7783                  |         |        |
|                                |                                  | Conserved                        | 0.0346       | 0.8989                  |         |        |
|                                |                                  | Mean magnitude of CTL responses  | All epitopes | 0.1235                  | 0.6485  |        |
|                                | Variable                         |                                  | 0.0265       | 0.9225                  |         |        |
|                                | Conserved                        |                                  | 0.0063       | 0.9816                  |         |        |

<sup>a</sup> Correlations were determined by Spearman's rank coefficient, and significant correlations ( $p$  value  $>0.05$ ) are highlighted gray.

<sup>b</sup> VL, viral load.

<sup>c</sup> Chronic CTL responses were measured in 16 subjects: at a single time point in 7 subjects and at two time points in 9 subjects. Two parallel analyses were conducted. Analysis 1 used data from the former seven subjects and the data of the first time points from the latter nine subjects, and Analysis 2 used data from the former seven subjects and the data of the second time points from the latter nine subjects. Results from both analyses were generally similar. Hence, only the results from Analysis 1 are reported, unless there was disagreement between the two analyses.
